# Supplementary material
Source: publisher figshare collection journal article supplement (https://karger.figshare.com/ndownloader/files/8717479)
Supplement: Supplementary file 1 [file 8717479]

*Supplementary data*

**File 1 Circuit pressure monitoring during CRRT**

AOP = access outflow pressure; PFP = prefilter pressure; EP = effluent pressure; RIP = return inflow pressure; TMP = transmembrane pressure. TMP = (PFP+RIP)/2-EP (mmHg).

AOP = access outflow pressure (this is the negative pressure applied by the blood pump rotation to “draw” blood flow from the outflow lumen of the catheter)

PFP = pre-filter pressure (this is the positive pressure generated by the blood pump rotation which drives blood into the filter)

EP = effluent pressure (this is the typically negative pressure applied by the blood pump rotation to “draw” ultrafiltrate or dialysate or both flow [effluent] from the membrane)

RIP = return inflow pressure (this is the positive pressure generated by the blood pump rotation which drives blood into the return inflow lumen of the catheter)

TMP = transmembrane pressure (this the pressure across the membrane which is equal to the mean pressure on the blood side of the membrane minus the effluent pressure)

**File 2 Lifespan of different patterns of artificial kidney failure (AKF)**


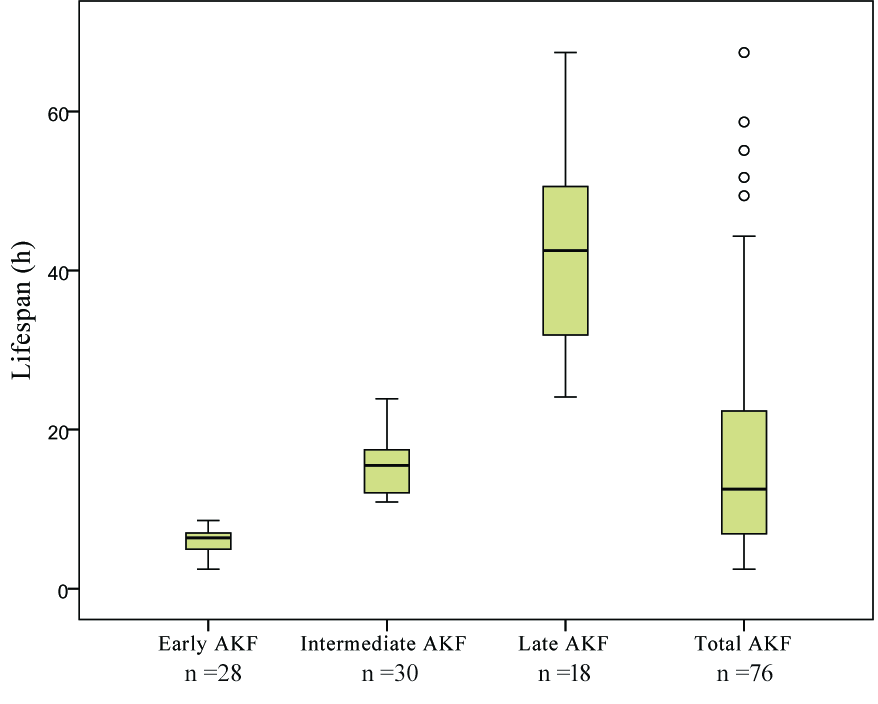


**File 3 Degrees of the drops of AOP**


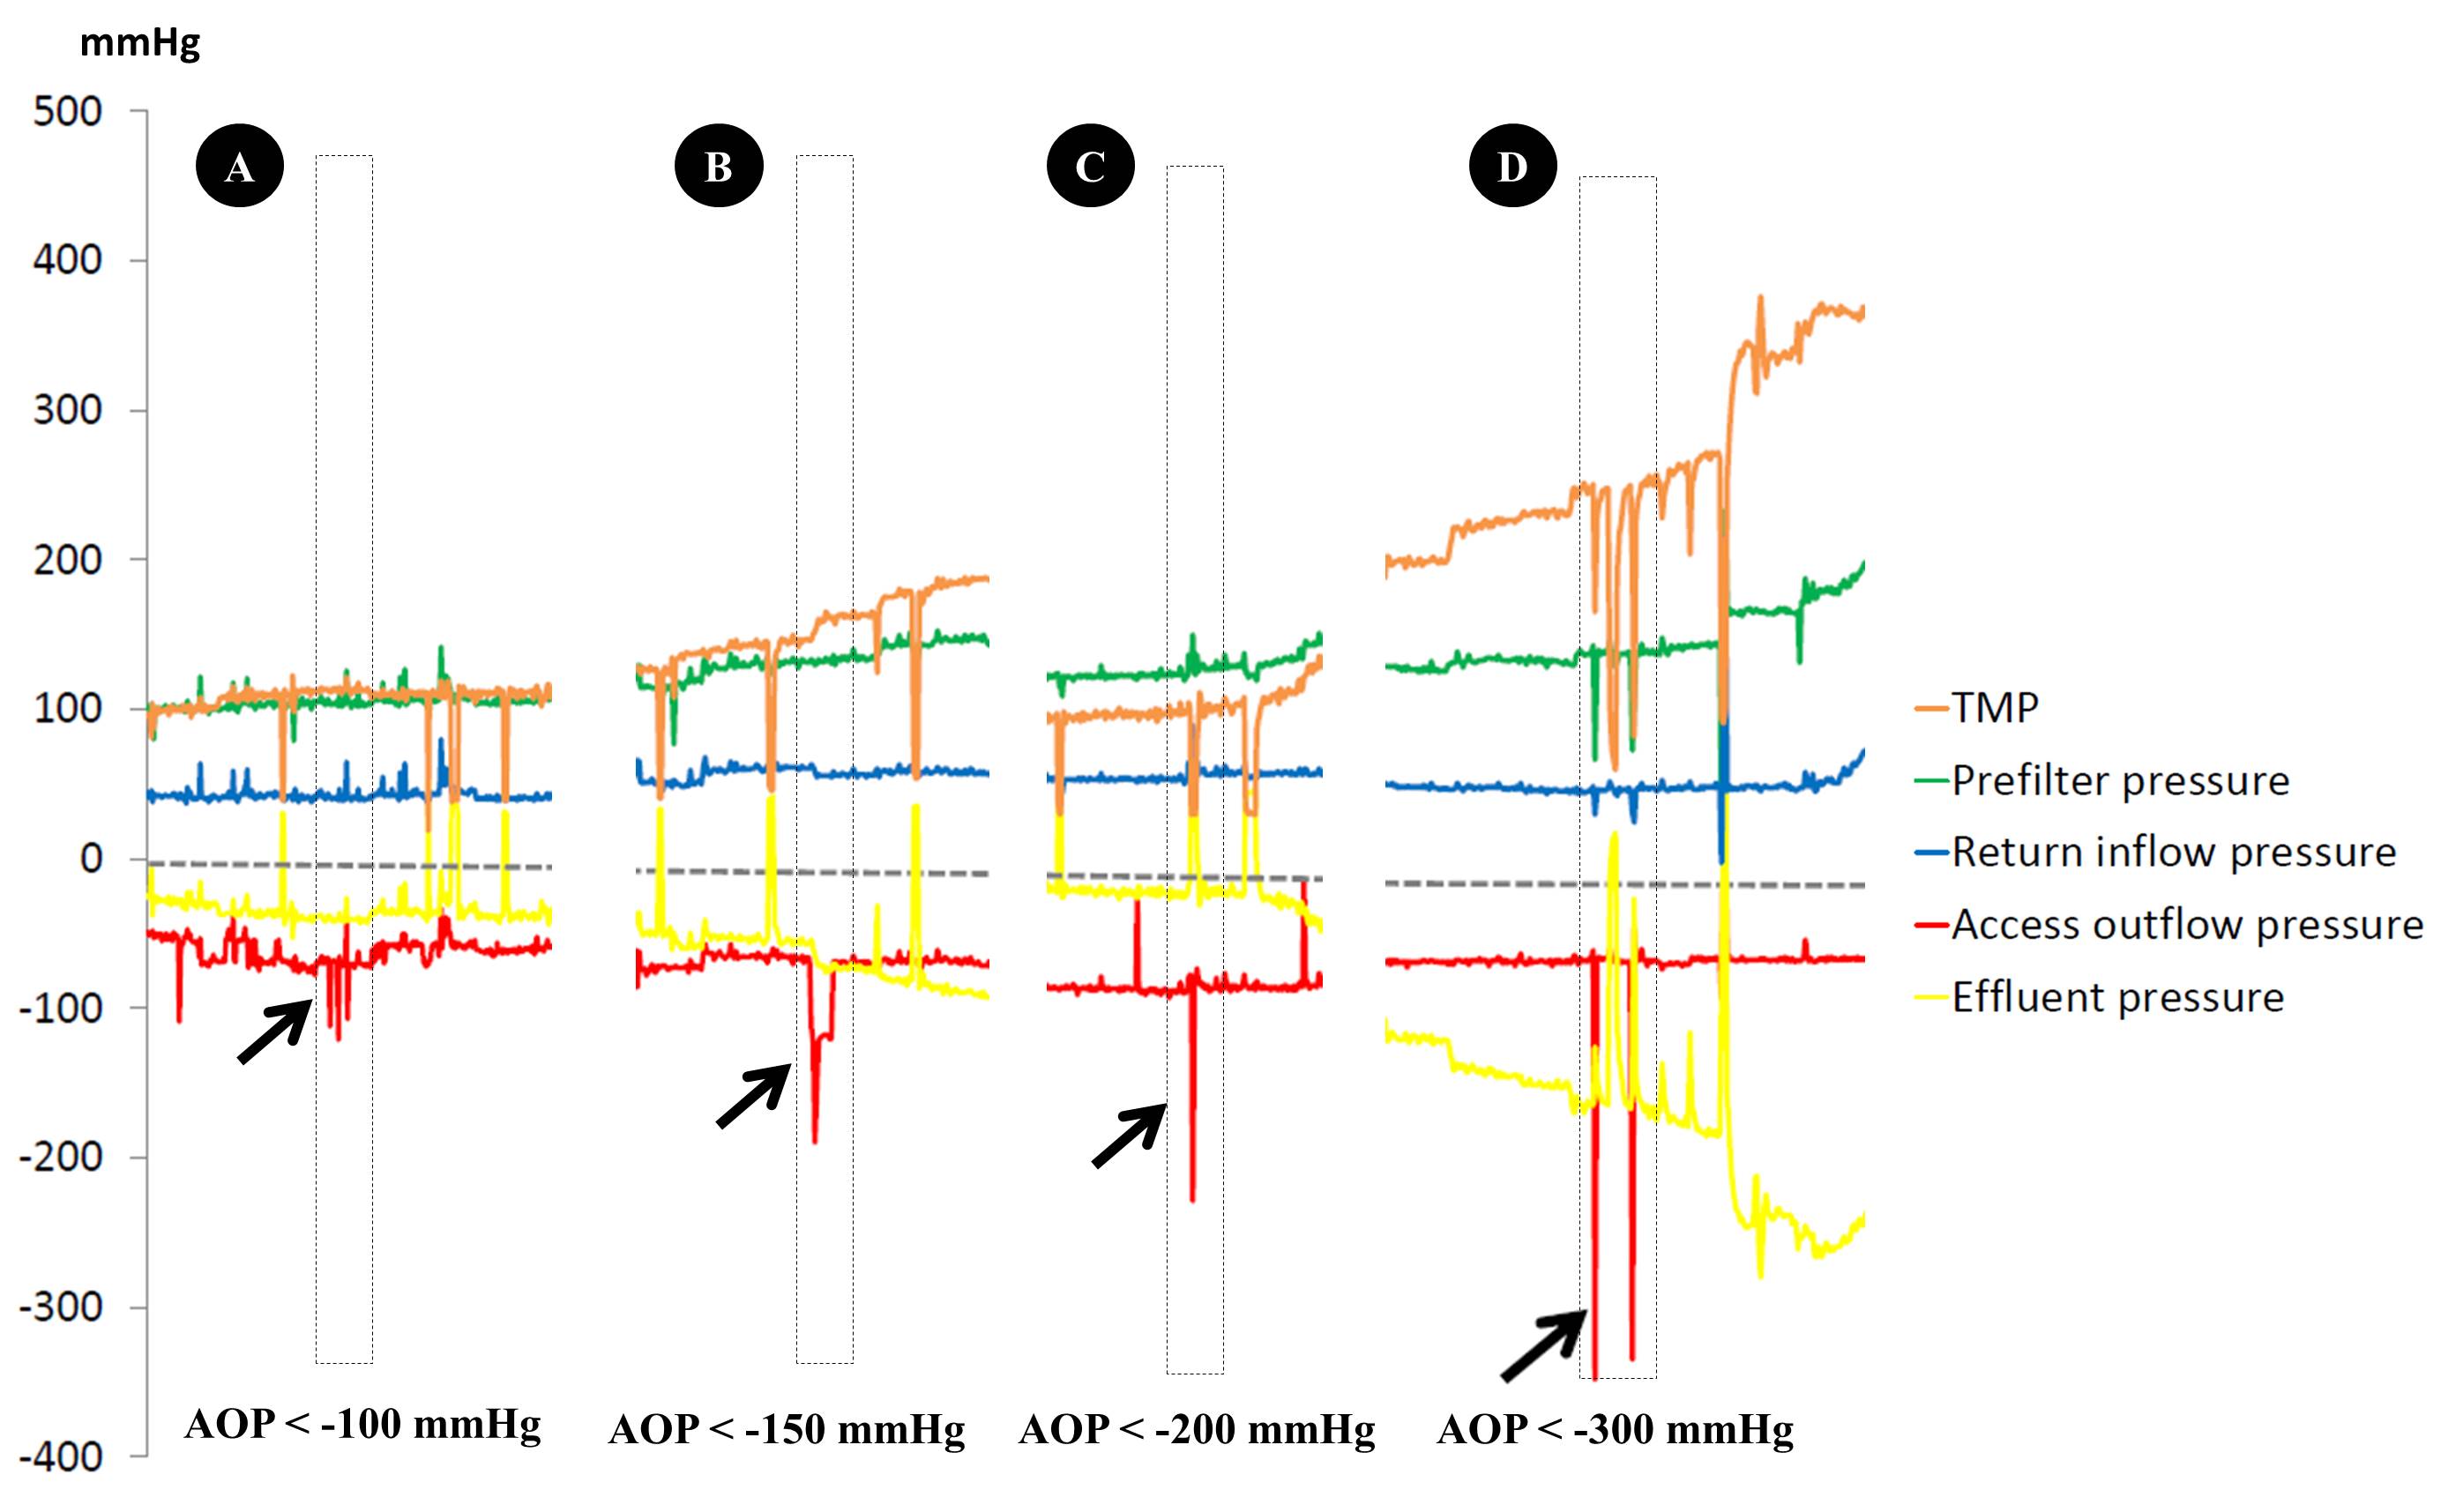


There were no obvious changes of PFP, EP and TMP when AOP decreased to -100 mmHg or -150 mmHg (File 3A, File 3B), indicating that the CRRT still “worked”. However, when AOP decreased to -200 mmHg or worse (File 3C, File 3D), dramatic changes of PFP, EP and TMP were found, indicating that the CRRT did not “work well” at that moment.

**File 4 Frequency of different patterns of access outflow dysfunction (AOD) (per 1000 CRRT-hr)**

**File 5** [**Correlation**](javascript:void(0);)[**analysis**](javascript:void(0);) **of pressures with lifespan**

TMP（r: -0.681，P <0.001）PFP（r: -0.617，P <0.001） EP（r: 0.623，P <0.001）

Increase in TMP (mmHg/h)


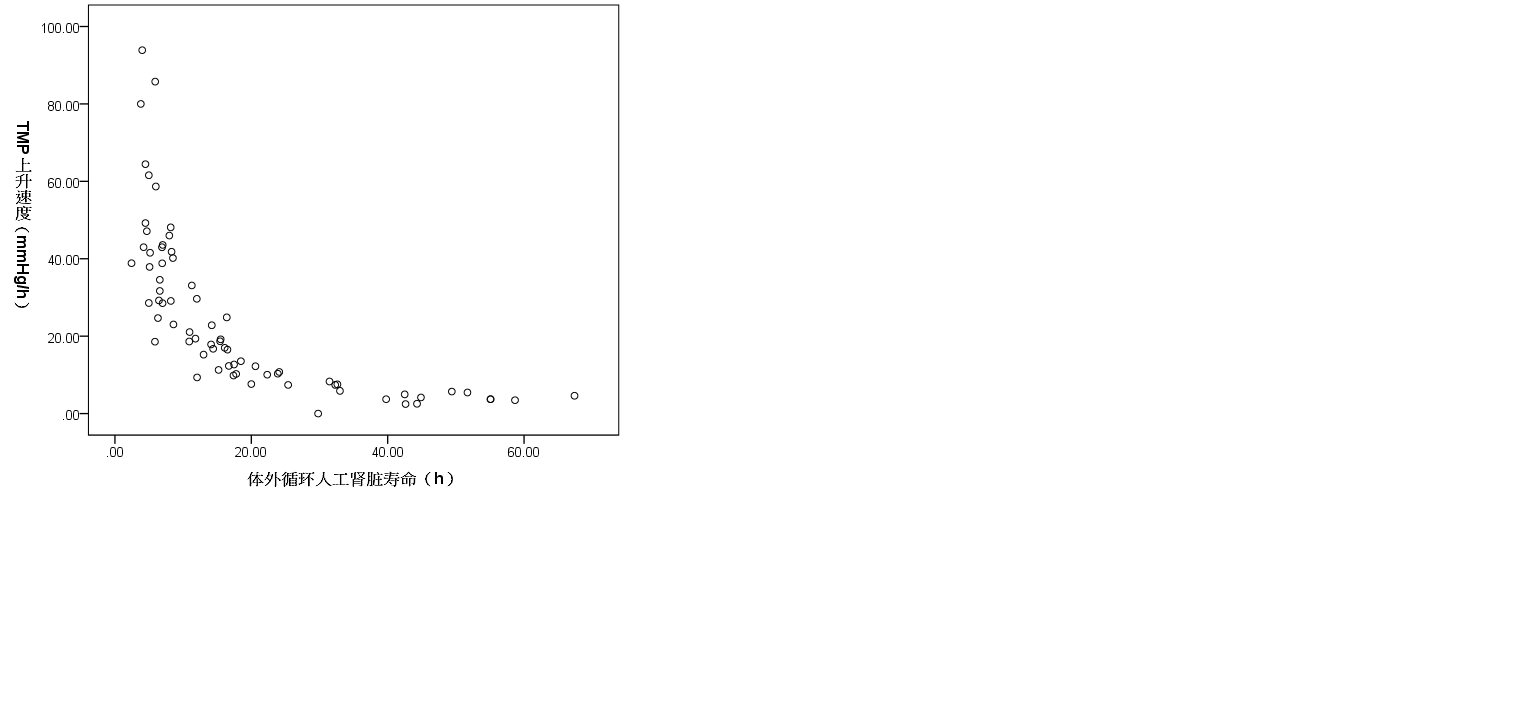
 Lifespan (h)

Increase in PFP (mmHg/h)


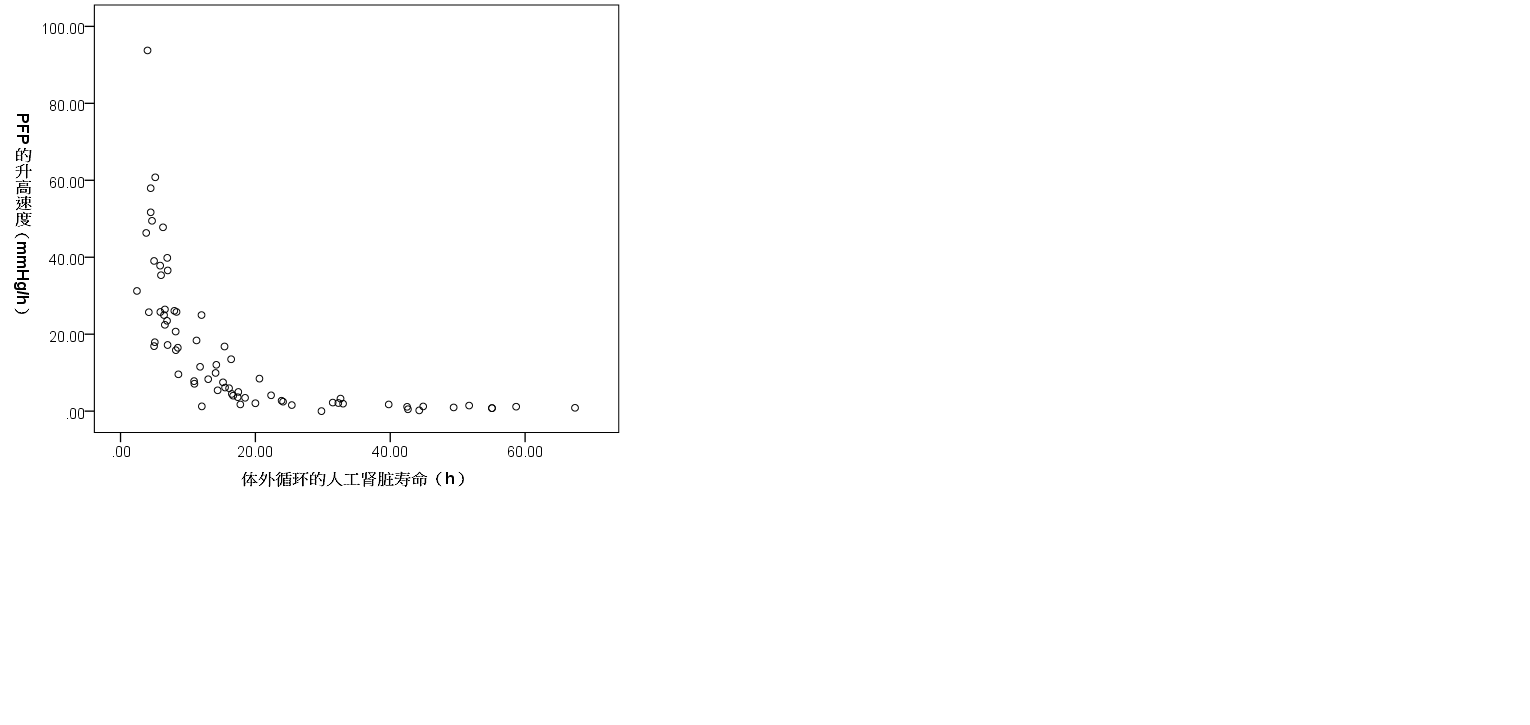
Lifespan (h)

Decrease in PE (mmHg/h)


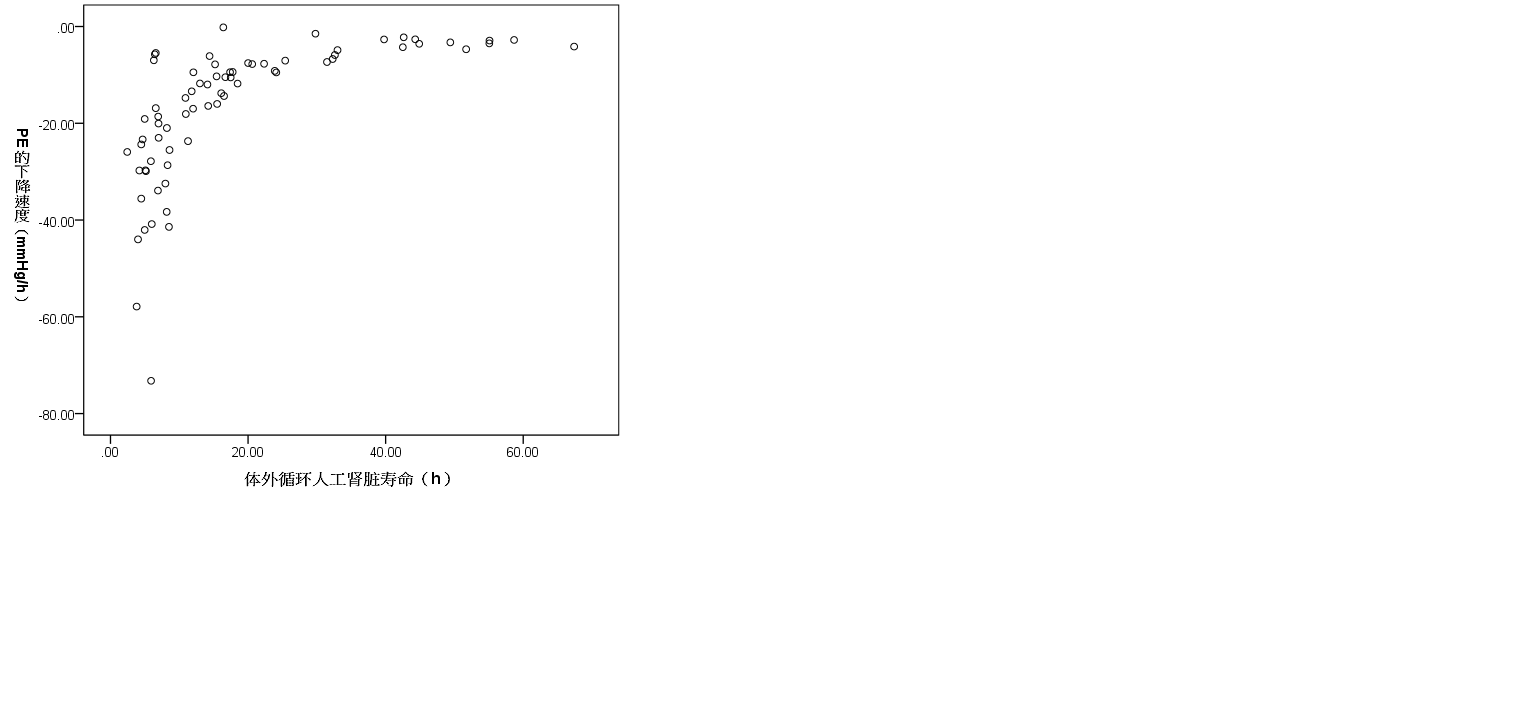
Lifespan (h)

**File 6 Multivariate analysis (Cox Regression Model) of factors associated with artificial kidney survival**

| Factors | Hazard ratio | 95% Cl | P value |
| --- | --- | --- | --- |
| Moderate-severe AOD | 0.33 | 0.15 to 0.72 | 0.005 |
| AOP variability >10 mmHg | 0.40 | 0.21 to 0.73 | 0.003 |
| PLT < 100 (109/L) | 2.09 | 1.17 to 3.73 | 0.013 |

Confounding variables considered include anticoagulant use, CRRT modality, CRRT dose, femoral access position, hemoglobin, PLT, INR, APTT, Ionized calcium and temperature.

**File 7 Survival of artificial kidney in different patterns of access outflow dysfunction (AOD) and access outflow pressure (AOP) variability**
